# Supplementary material for: Antifungal Activity of Bacillus velezensis CE 100 against Anthracnose Disease (Colletotrichum gloeosporioides) and Growth Promotion of Walnut (Juglans regia L.) Trees
Source: MDPI journal article supplement (doi:10.3390/ijms221910438), 2021-09-28
Supplement: s1 [file s1]

**Table S1.** ANOVA Table summary (cell growth, lytic enzyme production, antifungal activity against *Colletotrichum gloeosporioides* and plant growth promotion properties of *Bacillus velezensis* CE 100).

| Parameters                                                                             | Factor variable                                    | Sum of squares | DF     | Mean square | Critical value of t | F-ratio   | p-value | LSD vales |
|----------------------------------------------------------------------------------------|----------------------------------------------------|----------------|--------|-------------|---------------------|-----------|---------|-----------|
| Cell growth and lytic enzyme production of <i>B. velezensis</i> CE 100                 | <sup>2</sup> CFU (CFU)/mL                          | 3269.7515      | 4.0000 | 817.4379    | 2.2281              | 55.2300   | <0.0001 | 6.9990    |
|                                                                                        | <sup>3</sup> Chitinase (units/mL)                  | 3987.0734      | 4.0000 | 996.7684    | 2.2281              | 3161.8700 | <0.0001 | 1.0215    |
|                                                                                        | <sup>3</sup> $\beta$ -1,3-Glucanase (units/mL)     | 2.8722         | 4.0000 | 0.7181      | 2.2281              | 226.2800  | <0.0001 | 0.1025    |
|                                                                                        | <sup>3</sup> Protease (units/mL)                   | 27.6897        | 4.0000 | 6.9224      | 2.2281              | 5.6900    | 0.0118  | 2.0065    |
|                                                                                        | <sup>3</sup> Crude enzyme (units/mL)               | 5512.1207      | 2.0000 | 2756.0603   | 2.4469              | 4403.3600 | <0.0001 | 1.5806    |
| Antifungal activity against <i>C. gloeosporioides</i>                                  | <sup>4</sup> Spore germination (%)                 | 1825.5256      | 2.0000 | 912.7628    | 2.4469              | 141.2800  | <0.0001 | 5.0782    |
|                                                                                        | <sup>5</sup> Mycelia growth inhibition (%)         | 429.0048       | 2.0000 | 214.5024    | 2.4469              | 17.8800   | 0.003   | 6.9195    |
|                                                                                        | <sup>6</sup> Disease severity (%)                  | 11282.5089     | 2.0000 | 5641.2544   | 2.0345              | 128.9000  | <0.0001 | 5.4948    |
| Plant growth promotion activity of <i>B. velezensis</i> CE 100 against on walnut trees | <sup>7</sup> IAA ( $\mu$ g/mL)                     | 1.1560         | 4.0000 | 0.2890      | 2.2281              | 55.0600   | <0.0001 | 0.1318    |
|                                                                                        | <sup>8</sup> Phosphate solubilization( $\mu$ g/mL) | 1.5735         | 4.0000 | 0.3934      | 2.2281              | 28.8700   | <0.0001 | 0.2124    |
|                                                                                        | <sup>8</sup> pH                                    | 2.7090         | 4.0000 | 0.6772      | 2.2281              | 7.4600    | 0.0047  | 0.5483    |
|                                                                                        | <sup>a</sup> Chlorophyll content (SPAD unit)       | 920.0519       | 2.0000 | 460.0260    | 2.0227              | 86.2200   | <0.0001 | 1.7659    |
|                                                                                        | <sup>a</sup> Shoot length (cm)                     | 16331.6591     | 2.0000 | 8165.8295   | 2.0227              | 9.1600    | 0.0005  | 22.8210   |
|                                                                                        | <sup>a</sup> Root collar diameter (mm)             | 1827.5119      | 2.0000 | 913.7560    | 2.0227              | 13.2100   | <0.0001 | 6.3590    |
|                                                                                        | <sup>a</sup> Biomass (g)                           | 1582513.4710   | 2.0000 | 791256.7360 | 2.0639              | 36.7000   | <0.0001 | 142.8500  |
|                                                                                        | <sup>b</sup> Nitrogen concentration (%)            | 2.0204         | 2.0000 | 1.0102      | 2.0639              | 15.8900   | <0.0001 | 0.2453    |
|                                                                                        | <sup>b</sup> Phosphorous concentration (%)         | 0.0560         | 2.0000 | 0.0282      | 2.0639              | 6.9800    | 0.0041  | 0.0616    |
|                                                                                        | <sup>b</sup> Nitrogen content (g/plant)            | 109.3234       | 2.0000 | 54.6617     | 2.0639              | 19.1100   | <0.0001 | 1.6455    |
|                                                                                        | <sup>b</sup> Phosphorous content (g/plant)         | 3.7422         | 2.0000 | 1.8711      | 2.0639              | 11.9800   | 0.0002  | 0.3844    |

Alpha ( $\alpha$ ) = 0.05. Superscripts; 2, 3, 4, 5, 6, 7 and, 8 indicate data presented in Figures 2, 3, 4, 5, 6, 7 and 8, respectively. Superscripts; a and b indicate data presented in Tables 1 and 2, respectively. DF is degrees of freedom and LSD is least significant difference.
